# Supplementary material for: An order independent algorithm for inferring gene regulatory network using quantile value for conditional independence tests
Source: PubMed Central journal article supplement (PMC8027014; doi:10.1038/s41598-021-87074-5), 2021-04-07
Supplement: 41598_2021_87074_MOESM1_ESM.pdf [file 41598_2021_87074_MOESM1_ESM.pdf]

# An Order Independent Algorithm for Inferring Gene Regulatory Network Using Quantile Value for Conditional Independence Tests

Sayyed Hadi Mahmoodi <sup>1</sup>, Rosa Aghdam<sup>2,1\*</sup>, Changiz Eslahchi <sup>1,2\*</sup>

<sup>1</sup>Department of Computer and Data Sciences, Faculty of Mathematical Sciences, Shahid Beheshti University, Tehran, Iran.

<sup>2</sup> School of Biological Science, Institute for Research in Fundamental Sciences (IPM), Tehran, Iran.

\* ch-eslahchi@sbu.ac.ir, rosa.aghdam@ipm.ir

## Contents

1 Supplementary Materials

1

## 1 Supplementary Materials

**Table S1.** Results for DREAM3-size50-Yeast1.

| Algorithm | TP        | FP        | PPV          | TPR          | ACC          | F-measure    | FPR          | FDR          | MCC          |
|-----------|-----------|-----------|--------------|--------------|--------------|--------------|--------------|--------------|--------------|
| PCA-CMI   | 36        | 39        | 0.48         | 0.468        | 0.935        | 0.474        | 0.034        | 0.52         | 0.439        |
| CN        | 39        | <b>29</b> | <b>0.574</b> | 0.506        | 0.945        | 0.538        | <b>0.025</b> | 0.426        | 0.510        |
| CMI2NI    | 39        | 40        | 0.494        | 0.506        | 0.936        | 0.5          | 0.035        | 0.506        | 0.466        |
| OIPCQ     | <b>40</b> | 30        | 0.572        | <b>0.519</b> | <b>0.945</b> | <b>0.544</b> | 0.026        | <b>0.429</b> | <b>0.516</b> |
| OIPCQ2    | 39        | 35        | 0.527        | 0.506        | 0.94         | 0.517        | 0.03         | 0.473        | 0.485        |

**Table S2.** Results for DREAM3-size100-Yeast1.

| Algorithm | TP        | FP        | PPV          | TPR          | ACC          | F-measure    | FPR          | FDR          | MCC          |
|-----------|-----------|-----------|--------------|--------------|--------------|--------------|--------------|--------------|--------------|
| PCA-CMI   | 57        | 48        | 0.543        | 0.343        | 0.968        | 0.421        | 0.010        | 0.457        | 0.416        |
| CN        | 72        | 35        | 0.673        | 0.434        | 0.974        | 0.527        | 0.007        | 0.327        | 0.528        |
| CMI2NI    | 64        | 38        | 0.627        | 0.386        | 0.972        | 0.478        | 0.008        | 0.373        | 0.479        |
| OIPCQ     | <b>75</b> | <b>34</b> | <b>0.688</b> | <b>0.451</b> | <b>0.974</b> | <b>0.545</b> | <b>0.007</b> | <b>0.311</b> | <b>0.546</b> |
| OIPCQ2    | <b>75</b> | 43        | 0.636        | <b>0.451</b> | 0.973        | 0.528        | 0.009        | 0.364        | 0.523        |

**Table S3.** Threshold values for methods used on five networks of DREAM4 datasets.

| Algorithm                              | Dataset       |               |               |               |               |
|----------------------------------------|---------------|---------------|---------------|---------------|---------------|
|                                        | 169 edges     | 242 edges     | 192 edges     | 207 edges     | 191 edges     |
| PCA-CMI                                | 0.06          | 0.03          | 0.04          | 0.04          | 0.05          |
| CN <sub>Consensus</sub>                | 0.8           | 0.4           | 0.6           | 0.6           | 0.9           |
| CN <sub>Ind.Test</sub>                 | (0.03 , 0.06) | (0.02 , 0.05) | (0.03 , 0.06) | (0.02 , 0.05) | (0.02 , 0.05) |
| CMI2NI                                 | 0.06          | 0.03          | 0.06          | 0.05          | 0.06          |
| OIPCQ <sub><math>\theta_1</math></sub> | 0.06          | 0.02          | 0.05          | 0.02          | 0.08          |
| OIPCQ <sub><math>\theta_2</math></sub> | 0.01          | 0.03          | 0.04          | 0.05          | 0.06          |

**Table S4.** Results for DREAM4-size100 multifactorial-Net1 dataset.

| Algorithm | TP        | FP        | PPV          | TPR          | ACC          | F-measure    | FPR          | FDR          | MCC          |
|-----------|-----------|-----------|--------------|--------------|--------------|--------------|--------------|--------------|--------------|
| PCA-CMI   | 30        | 24        | 0.556        | 0.178        | 0.967        | 0.269        | 0.005        | 0.444        | 0.302        |
| CN        | 31        | <b>21</b> | <b>0.596</b> | 0.183        | <b>0.968</b> | 0.281        | <b>0.004</b> | <b>0.404</b> | 0.319        |
| CMI2NI    | 33        | 25        | 0.569        | 0.195        | 0.967        | 0.291        | 0.005        | 0.431        | 0.321        |
| OIPCQ     | <b>36</b> | 25        | 0.591        | <b>0.204</b> | <b>0.968</b> | <b>0.304</b> | 0.005        | 0.409        | <b>0.334</b> |
| OIPCQ2    | <b>36</b> | 32        | 0.529        | <b>0.213</b> | 0.967        | 0.304        | 0.007        | 0.471        | 0.322        |

**Table S5.** Results for DREAM4-size100 multifactorial-Net2 dataset.

| Algorithm | TP        | FP        | PPV          | TPR          | ACC          | F-measure    | FPR          | FDR          | MCC         |
|-----------|-----------|-----------|--------------|--------------|--------------|--------------|--------------|--------------|-------------|
| PCA-CMI   | 50        | 91        | 0.355        | 0.207        | 0.943        | 0.261        | 0.019        | 0.645        | 0.243       |
| CN        | 55        | 86        | 0.390        | 0.227        | 0.945        | 0.287        | 0.018        | 0.610        | 0.271       |
| CMI2NI    | 54        | 93        | 0.367        | 0.223        | 0.943        | 0.278        | 0.020        | 0.633        | 0.258       |
| OIPCQ     | 64        | 79        | 0.448        | 0.264        | 0.948        | 0.332        | 0.017        | 0.552        | 0.319       |
| OIPCQ2    | <b>65</b> | <b>74</b> | <b>0.468</b> | <b>0.269</b> | <b>0.949</b> | <b>0.341</b> | <b>0.016</b> | <b>0.532</b> | <b>0.33</b> |

**Table S6.** Results for DREAM4-size100 multifactorial-Net3 dataset.

| Algorithm | TP        | FP        | PPV          | TPR          | ACC          | F-measure    | FPR          | FDR          | MCC          |
|-----------|-----------|-----------|--------------|--------------|--------------|--------------|--------------|--------------|--------------|
| PCA-CMI   | 68        | 68        | 0.5          | 0.354        | 0.961        | 0.415        | 0.014        | 0.5          | 0.401        |
| CN        | 58        | 44        | 0.569        | 0.302        | 0.964        | 0.395        | 0.009        | 0.431        | 0.398        |
| CMI2NI    | 61        | 36        | 0.629        | 0.318        | 0.966        | 0.422        | 0.008        | 0.371        | 0.432        |
| OIPCQ     | 65        | <b>35</b> | <b>0.650</b> | 0.333        | <b>0.967</b> | <b>0.441</b> | <b>0.007</b> | <b>0.350</b> | <b>0.450</b> |
| OIPCQ2    | <b>69</b> | 57        | 0.548        | <b>0.359</b> | 0.964        | 0.434        | 0.012        | 0.452        | 0.426        |

**Table S7.** Results for DREAM4-size100 multifactorial-Net4 dataset.

| Algorithm | TP        | FP        | PPV          | TPR          | ACC          | F-measure    | FPR          | FDR          | MCC         |
|-----------|-----------|-----------|--------------|--------------|--------------|--------------|--------------|--------------|-------------|
| PCA-CMI   | 61        | 90        | 0.404        | 0.295        | 0.952        | 0.341        | 0.019        | 0.596        | 0.321       |
| CN        | <b>65</b> | 85        | 0.433        | <b>0.314</b> | 0.954        | 0.364        | 0.018        | 0.567        | 0.346       |
| CMI2NI    | 60        | 68        | 0.469        | 0.290        | 0.957        | 0.358        | 0.014        | 0.531        | 0.347       |
| OIPCQ     | 64        | <b>60</b> | <b>0.516</b> | 0.309        | <b>0.959</b> | <b>0.387</b> | <b>0.013</b> | <b>0.484</b> | <b>0.38</b> |
| OIPCQ2    | 62        | 64        | 0.492        | 0.3          | 0.958        | 0.372        | <b>0.013</b> | 0.508        | 0.364       |

**Table S8.** Results for DREAM4-size100 multifactorial-Net5 dataset.

| Algorithm | TP        | FP        | PPV          | TPR          | ACC          | F-measure    | FPR          | FDR          | MCC          |
|-----------|-----------|-----------|--------------|--------------|--------------|--------------|--------------|--------------|--------------|
| PCA-CMI   | <b>50</b> | 74        | 0.403        | <b>0.262</b> | 0.957        | 0.318        | 0.016        | 0.597        | 0.303        |
| CN        | 49        | 51        | 0.49         | 0.257        | 0.961        | <b>0.337</b> | 0.011        | 0.51         | 0.337        |
| CMI2NI    | <b>50</b> | 59        | 0.459        | <b>0.262</b> | 0.96         | 0.333        | 0.012        | 0.541        | 0.327        |
| OIPCQ     | 49        | <b>37</b> | <b>0.569</b> | 0.253        | <b>0.963</b> | <b>0.351</b> | <b>0.007</b> | <b>0.430</b> | <b>0.364</b> |
| OIPCQ2    | 45        | 42        | 0.517        | 0.236        | 0.962        | 0.324        | 0.009        | 0.483        | 0.332        |

**Table S9.** Threshold values for methods used on SOS-DNA and AML datasets.

| Algorithm               | Dataset                    |                     |
|-------------------------|----------------------------|---------------------|
|                         | SOS-DNA: 9 genes, 24 edges | AML:81 genes, edges |
| PCA-CMI                 | 0.01                       | 0.01                |
| CN <sub>Consensus</sub> | 0.85                       | 0.6                 |
| CN <sub>Ind.Test</sub>  | (0.0, 0.01)                | (0.005, 0.01)       |
| CMI2NI                  | 0.01                       | 0.01                |
| OIPCQ <sub>θ1</sub>     | 0.01                       | 0.01                |
| OIPCQ <sub>θ2</sub>     | 0.01                       | 0.01                |

**Table S10.** Comparison of results on the SOS-DNA dataset.

| Algorithm | TP        | FP       | PPV          | TPR          | ACC          | F-measure    | FPR         | FDR          | MCC          |
|-----------|-----------|----------|--------------|--------------|--------------|--------------|-------------|--------------|--------------|
| PCA-CMI   | <b>19</b> | <b>3</b> | <b>0.864</b> | <b>0.792</b> | <b>0.778</b> | <b>0.826</b> | <b>0.25</b> | <b>0.136</b> | <b>0.524</b> |
| CN        | <b>19</b> | <b>3</b> | <b>0.864</b> | <b>0.792</b> | <b>0.778</b> | <b>0.826</b> | <b>0.25</b> | <b>0.136</b> | <b>0.524</b> |
| CMI2NI    | <b>19</b> | <b>3</b> | <b>0.864</b> | <b>0.792</b> | <b>0.778</b> | <b>0.826</b> | <b>0.25</b> | <b>0.136</b> | <b>0.524</b> |
| OIPCQ     | <b>19</b> | <b>3</b> | <b>0.864</b> | <b>0.792</b> | <b>0.778</b> | <b>0.826</b> | <b>0.25</b> | <b>0.136</b> | <b>0.524</b> |
| OIPCQ2    | 18        | <b>3</b> | 0.857        | 0.75         | 0.75         | 0.8          | <b>0.25</b> | 0.143        | 0.478        |

**Table S11.** Comparison of results on the AML dataset.

| Algorithm | TP         | FP         | PPV          | TPR        | ACC         | F-measure    | FPR          | FDR          | MCC          |
|-----------|------------|------------|--------------|------------|-------------|--------------|--------------|--------------|--------------|
| PCA-CMI   | 113        | 453        | 0.2          | <b>0.5</b> | 0.825       | 0.285        | 0.15         | 0.8          | 0.234        |
| CN        | 113        | 450        | 0.201        | <b>0.5</b> | 0.826       | 0.286        | 0.149        | 0.799        | 0.235        |
| CMI2NI    | 113        | 437        | 0.205        | <b>0.5</b> | <b>0.83</b> | 0.291        | <b>0.145</b> | 0.795        | 0.24         |
| OIPCQ     | 113        | <b>436</b> | <b>0.206</b> | 0.498      | <b>0.83</b> | 0.291        | <b>0.145</b> | 0.795        | 0.24         |
| OIPCQ2    | <b>114</b> | 439        | <b>0.206</b> | <b>0.5</b> | <b>0.83</b> | <b>0.292</b> | 0.146        | <b>0.794</b> | <b>0.242</b> |

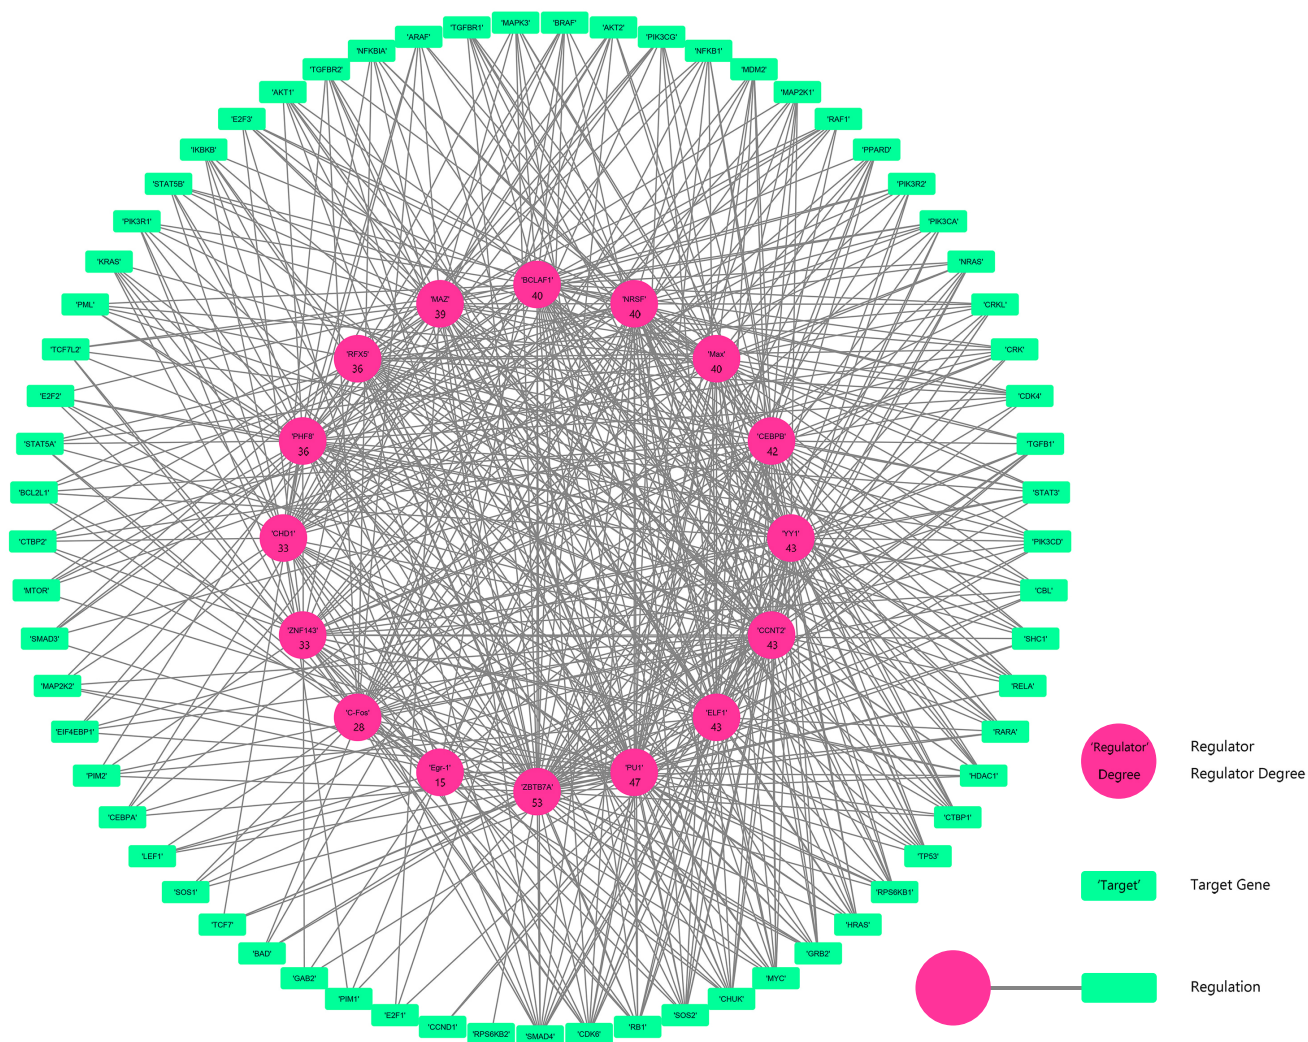**Figure S1.** GRN of AML that infer by OIPCQ.

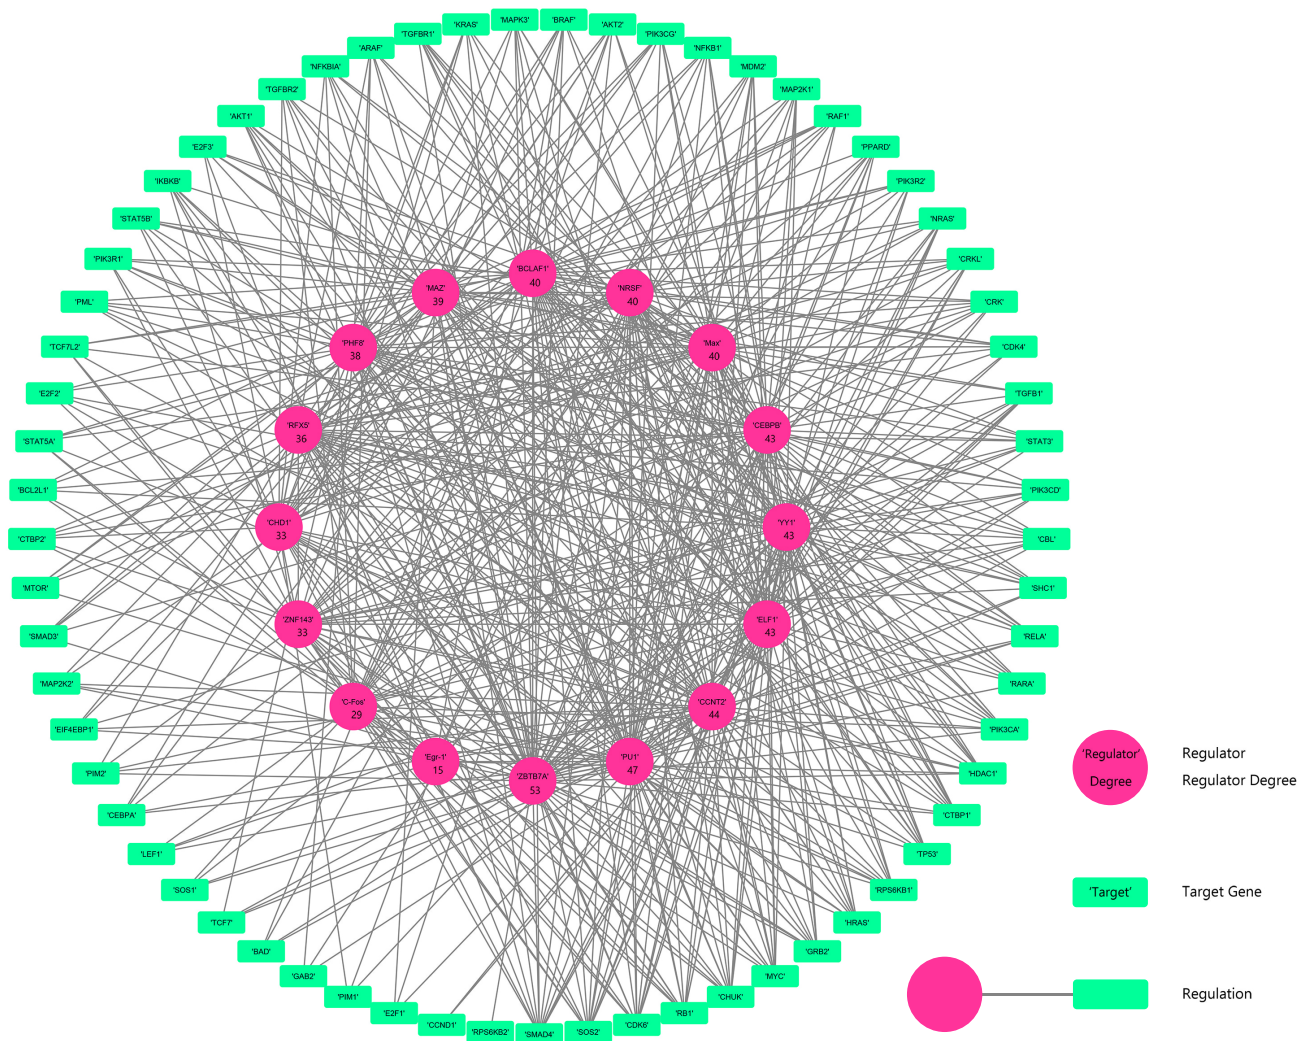

**Figure S2.** GRN of AML that infer by OIPCQ2.

**Table S12.** Comparison of different methods with AML.

| Gene   | RACER | PCA-CMI | CN | CMI2NI | OIPCQ(based cmi) | OIPCQ(based cmi2) |
|--------|-------|---------|----|--------|------------------|-------------------|
| BCLAF1 | 6     | 47      | 47 | 37     | 40               | 40                |
| C-Fos  | 7     | 30      | 30 | 28     | 28               | 29                |
| CCNT2  | 31    | 46      | 46 | 43     | 43               | 44                |
| CEBPB  | 2     | 43      | 43 | 44     | 42               | 43                |
| CHD1   | 6     | 33      | 33 | 32     | 33               | 33                |
| ELF1   | 35    | 43      | 43 | 44     | 43               | 43                |
| Egr-1  | 13    | 20      | 20 | 16     | 15               | 15                |
| MAZ    | 24    | 47      | 47 | 38     | 39               | 39                |
| Max    | 23    | 39      | 38 | 38     | 40               | 40                |
| NRSF   | 1     | 46      | 46 | 39     | 40               | 40                |
| PHF8   | 40    | 38      | 38 | 40     | 36               | 38                |
| PU1    | 9     | 40      | 40 | 51     | 47               | 47                |
| RFX5   | 5     | 35      | 34 | 37     | 36               | 36                |
| YY1    | 26    | 36      | 36 | 45     | 43               | 43                |
| ZBTB7A | 12    | 53      | 52 | 51     | 53               | 53                |
| ZNF143 | 4     | 36      | 35 | 35     | 33               | 33                |

**Table S13.** Pathways of BCLAF1 due to the GRN of AML that infer by OIPCQ with cmi.

| No. | Base | Pathway (Database)                                  | Genes in pathway | Genes overlapped | p-value  | q-value  |
|-----|------|-----------------------------------------------------|------------------|------------------|----------|----------|
| 1   | ALL  | CHRONIC MYELOID LEUKEMIA (KEGG)                     | 73               | 25               | 2.17e-41 | 1.80e-38 |
| 2   | ALL  | PATHWAYS IN CANCER (KEGG)                           | 328              | 31               | 2.41e-34 | 1.00e-31 |
| 3   | ALL  | ACUTE MYELOID LEUKEMIA (KEGG)                       | 60               | 20               | 3.03e-32 | 8.41e-30 |
| 4   | ALL  | PANCREATIC CANCER (KEGG)                            | 70               | 17               | 1.52e-24 | 3.16e-22 |
| 5   | ALL  | NON SMALL CELL LUNG CANCER (KEGG)                   | 54               | 15               | 1.36e-22 | 2.27e-20 |
| 6   | ALL  | ENDOMETRIAL CANCER (KEGG)                           | 52               | 14               | 7.26e-21 | 1.01e-18 |
| 7   | ALL  | PROSTATE CANCER (KEGG)                              | 89               | 16               | 8.51e-21 | 1.01e-18 |
| 8   | ALL  | COLORECTAL CANCER (KEGG)                            | 62               | 14               | 1.13e-19 | 1.17e-17 |
| 9   | ALL  | GLIOMA (KEGG)                                       | 65               | 14               | 2.33e-19 | 2.15e-17 |
| 10  | ALL  | ERBB SIGNALING PATHWAY (KEGG)                       | 87               | 15               | 3.44e-19 | 2.87e-17 |
| 11  | ALL  | MELANOMA (KEGG)                                     | 71               | 14               | 8.88e-19 | 6.72e-17 |
| 12  | ALL  | RACCYCD PATHWAY (BIOCARTA)                          | 26               | 10               | 7.74e-17 | 5.37e-15 |
| 13  | ALL  | NEUROTROPHIN SIGNALING PATHWAY (KEGG)               | 126              | 15               | 1.08e-16 | 6.92e-15 |
| 14  | ALL  | RENAL CELL CARCINOMA (KEGG)                         | 70               | 12               | 2.35e-15 | 1.40e-13 |
| 15  | ALL  | INSULIN SIGNALING PATHWAY (KEGG)                    | 137              | 14               | 1.21e-14 | 6.70e-13 |
| 16  | ALL  | SMALL CELL LUNG CANCER (KEGG)                       | 84               | 12               | 2.31e-14 | 1.20e-12 |
| 17  | ALL  | DOWN STREAM SIGNAL TRANSDUCTION (REACTOME)          | 35               | 9                | 2.12e-13 | 1.04e-11 |
| 18  | ALL  | B CELL RECEPTOR SIGNALING PATHWAY (KEGG)            | 75               | 11               | 2.43e-13 | 1.13e-11 |
| 19  | ALL  | TRKA SIGNALLING FROM THE PLASMA MEMBRANE (REACTOME) | 103              | 12               | 2.81e-13 | 1.20e-11 |
| 20  | ALL  | SIGNALLING BY NGF (REACTOME)                        | 215              | 15               | 2.87e-13 | 1.20e-11 |
| 21  | ALL  | GLEEVEC PATHWAY (BIOCARTA)                          | 23               | 8                | 3.29e-13 | 1.25e-11 |
| 22  | ALL  | RAS PATHWAY (BIOCARTA)                              | 23               | 8                | 3.29e-13 | 1.25e-11 |
| 23  | ALL  | IL2RB PATHWAY (BIOCARTA)                            | 38               | 9                | 4.81e-13 | 1.73e-11 |
| 24  | ALL  | T CELL RECEPTOR SIGNALING PATHWAY (KEGG)            | 108              | 12               | 4.98e-13 | 1.73e-11 |
| 25  | ALL  | CHEMOKINE SIGNALING PATHWAY (KEGG)                  | 190              | 14               | 1.07e-12 | 3.55e-11 |
| 26  | ALL  | BLADDER CANCER (KEGG)                               | 42               | 9                | 1.29e-12 | 4.02e-11 |
| 27  | ALL  | MAPK PATHWAY (BIOCARTA)                             | 87               | 11               | 1.30e-12 | 4.02e-11 |

**Table S14.** Pathways of NRSF due to the GRN of AML that infer by OIPCQ with cmi.

| No. | Base | Pathway (Database)                         | Genes in pathway | Genes overlapped | p-value  | q-value  |
|-----|------|--------------------------------------------|------------------|------------------|----------|----------|
| 1   | ALL  | CHRONIC MYELOID LEUKEMIA (KEGG)            | 73               | 26               | 8.90e-44 | 7.42e-41 |
| 2   | ALL  | PATHWAYS IN CANCER (KEGG)                  | 328              | 28               | 5.47e-29 | 2.28e-26 |
| 3   | ALL  | ACUTE MYELOID LEUKEMIA (KEGG)              | 60               | 14               | 6.78e-20 | 1.88e-17 |
| 4   | ALL  | IL2RB PATHWAY (BIOCARTA)                   | 38               | 12               | 7.12e-19 | 1.19e-16 |
| 5   | ALL  | PANCREATIC CANCER (KEGG)                   | 70               | 14               | 7.14e-19 | 1.19e-16 |
| 6   | ALL  | GLIOMA (KEGG)                              | 65               | 13               | 1.55e-17 | 2.15e-15 |
| 7   | ALL  | ERBB SIGNALING PATHWAY (KEGG)              | 87               | 14               | 1.82e-17 | 2.16e-15 |
| 8   | ALL  | PROSTATE CANCER (KEGG)                     | 89               | 14               | 2.53e-17 | 2.64e-15 |
| 9   | ALL  | NON SMALL CELL LUNG CANCER (KEGG)          | 54               | 12               | 8.25e-17 | 7.63e-15 |
| 10  | ALL  | SMALL CELL LUNG CANCER (KEGG)              | 84               | 13               | 5.31e-16 | 4.42e-14 |
| 11  | ALL  | RACCYCD PATHWAY (BIOCARTA)                 | 26               | 9                | 9.81e-15 | 7.43e-13 |
| 12  | ALL  | MELANOMA (KEGG)                            | 71               | 11               | 1.30e-13 | 9.00e-12 |
| 13  | ALL  | BLADDER CANCER (KEGG)                      | 42               | 9                | 1.28e-12 | 8.22e-11 |
| 14  | ALL  | DOWN STREAM SIGNAL TRANSDUCTION (REACTOME) | 35               | 8                | 1.48e-11 | 8.79e-10 |
| 15  | ALL  | CTCF PATHWAY (BIOCARTA)                    | 23               | 7                | 3.34e-11 | 1.74e-9  |
| 16  | ALL  | GLEEVEC PATHWAY (BIOCARTA)                 | 23               | 7                | 3.34e-11 | 1.74e-9  |
| 17  | ALL  | MAPK PATHWAY (BIOCARTA)                    | 87               | 10               | 4.16e-11 | 2.04e-9  |

**Table S15.** Pathways of BCLAF1 due to the GRN of AML that infer by OIPCQ2 with cmi2.

| No. | Base | Pathway (Database)                                  | Genes in pathway | Genes overlapped | p-value  | q-value  |
|-----|------|-----------------------------------------------------|------------------|------------------|----------|----------|
| 1   | ALL  | CHRONIC MYELOID LEUKEMIA (KEGG)                     | 73               | 25               | 2.17e-41 | 1.80e-38 |
| 2   | ALL  | PATHWAYS IN CANCER (KEGG)                           | 328              | 31               | 2.41e-34 | 1.00e-31 |
| 3   | ALL  | ACUTE MYELOID LEUKEMIA (KEGG)                       | 60               | 20               | 3.03e-32 | 8.41e-30 |
| 4   | ALL  | PANCREATIC CANCER (KEGG)                            | 70               | 17               | 1.52e-24 | 3.16e-22 |
| 5   | ALL  | NON SMALL CELL LUNG CANCER (KEGG)                   | 54               | 15               | 1.36e-22 | 2.27e-20 |
| 6   | ALL  | ENDOMETRIAL CANCER (KEGG)                           | 52               | 14               | 7.26e-21 | 1.01e-18 |
| 7   | ALL  | PROSTATE CANCER (KEGG)                              | 89               | 16               | 8.51e-21 | 1.01e-18 |
| 8   | ALL  | COLORECTAL CANCER (KEGG)                            | 62               | 14               | 1.13e-19 | 1.17e-17 |
| 9   | ALL  | GLIOMA (KEGG)                                       | 65               | 14               | 2.33e-19 | 2.15e-17 |
| 10  | ALL  | ERBB SIGNALING PATHWAY (KEGG)                       | 87               | 15               | 3.44e-19 | 2.87e-17 |
| 11  | ALL  | MELANOMA (KEGG)                                     | 71               | 14               | 8.88e-19 | 6.72e-17 |
| 12  | ALL  | RACCYCD PATHWAY (BIOCARTA)                          | 26               | 10               | 7.74e-17 | 5.37e-15 |
| 13  | ALL  | NEUROTROPHIN SIGNALING PATHWAY (KEGG)               | 126              | 15               | 1.08e-16 | 6.92e-15 |
| 14  | ALL  | RENAL CELL CARCINOMA (KEGG)                         | 70               | 12               | 2.35e-15 | 1.40e-13 |
| 15  | ALL  | INSULIN SIGNALING PATHWAY (KEGG)                    | 137              | 14               | 1.21e-14 | 6.70e-13 |
| 16  | ALL  | SMALL CELL LUNG CANCER (KEGG)                       | 84               | 12               | 2.31e-14 | 1.20e-12 |
| 17  | ALL  | DOWN STREAM SIGNAL TRANSDUCTION (REACTOME)          | 35               | 9                | 2.12e-13 | 1.04e-11 |
| 18  | ALL  | B CELL RECEPTOR SIGNALING PATHWAY (KEGG)            | 75               | 11               | 2.43e-13 | 1.13e-11 |
| 19  | ALL  | TRKA SIGNALLING FROM THE PLASMA MEMBRANE (REACTOME) | 103              | 12               | 2.81e-13 | 1.20e-11 |
| 20  | ALL  | SIGNALLING BY NGF (REACTOME)                        | 215              | 15               | 2.87e-13 | 1.20e-11 |
| 21  | ALL  | GLEEVEC PATHWAY (BIOCARTA)                          | 23               | 8                | 3.29e-13 | 1.25e-11 |
| 22  | ALL  | RAS PATHWAY (BIOCARTA)                              | 23               | 8                | 3.29e-13 | 1.25e-11 |
| 23  | ALL  | IL2RB PATHWAY (BIOCARTA)                            | 38               | 9                | 4.81e-13 | 1.73e-11 |
| 24  | ALL  | T CELL RECEPTOR SIGNALING PATHWAY (KEGG)            | 108              | 12               | 4.98e-13 | 1.73e-11 |
| 25  | ALL  | CHEMOKINE SIGNALING PATHWAY (KEGG)                  | 190              | 14               | 1.07e-12 | 3.55e-11 |
| 26  | ALL  | BLADDER CANCER (KEGG)                               | 42               | 9                | 1.29e-12 | 4.02e-11 |
| 27  | ALL  | MAPK PATHWAY (BIOCARTA)                             | 87               | 11               | 1.30e-12 | 4.02e-11 |

**Table S16.** Pathways of NRSF due to the GRN of AML that infer by OIPCQ2 with cmi2.

| No. | Base | Pathway (Database)                         | Genes in pathway | Genes overlapped | p-value  | q-value  |
|-----|------|--------------------------------------------|------------------|------------------|----------|----------|
| 1   | ALL  | CHRONIC MYELOID LEUKEMIA (KEGG)            | 73               | 26               | 8.90e-44 | 7.42e-41 |
| 2   | ALL  | PATHWAYS IN CANCER (KEGG)                  | 328              | 28               | 5.47e-29 | 2.28e-26 |
| 3   | ALL  | ACUTE MYELOID LEUKEMIA (KEGG)              | 60               | 14               | 6.78e-20 | 1.88e-17 |
| 4   | ALL  | IL2RB PATHWAY (BIOCARTA)                   | 38               | 12               | 7.12e-19 | 1.19e-16 |
| 5   | ALL  | PANCREATIC CANCER (KEGG)                   | 70               | 14               | 7.14e-19 | 1.19e-16 |
| 6   | ALL  | GLIOMA (KEGG)                              | 65               | 13               | 1.55e-17 | 2.15e-15 |
| 7   | ALL  | ERBB SIGNALING PATHWAY (KEGG)              | 87               | 14               | 1.82e-17 | 2.16e-15 |
| 8   | ALL  | PROSTATE CANCER (KEGG)                     | 89               | 14               | 2.53e-17 | 2.64e-15 |
| 9   | ALL  | NON SMALL CELL LUNG CANCER (KEGG)          | 54               | 12               | 8.25e-17 | 7.63e-15 |
| 10  | ALL  | SMALL CELL LUNG CANCER (KEGG)              | 84               | 13               | 5.31e-16 | 4.42e-14 |
| 11  | ALL  | RACCYCD PATHWAY (BIOCARTA)                 | 26               | 9                | 9.81e-15 | 7.43e-13 |
| 12  | ALL  | MELANOMA (KEGG)                            | 71               | 11               | 1.30e-13 | 9.00e-12 |
| 13  | ALL  | BLADDER CANCER (KEGG)                      | 42               | 9                | 1.28e-12 | 8.22e-11 |
| 14  | ALL  | DOWN STREAM SIGNAL TRANSDUCTION (REACTOME) | 35               | 8                | 1.48e-11 | 8.79e-10 |
| 15  | ALL  | CTCF PATHWAY (BIOCARTA)                    | 23               | 7                | 3.34e-11 | 1.74e-9  |
| 16  | ALL  | GLEEVEC PATHWAY (BIOCARTA)                 | 23               | 7                | 3.34e-11 | 1.74e-9  |
| 17  | ALL  | MAPK PATHWAY (BIOCARTA)                    | 87               | 10               | 4.16e-11 | 2.04e-9  |

**Table S17.** Pathways of ZBTB7A due to the GRN of AML that infer by OIPCQ with cmi.

| No. | Base | Pathway (Database)                                  | Genes in pathway | Genes overlapped | p-value  | q-value  |
|-----|------|-----------------------------------------------------|------------------|------------------|----------|----------|
| 1   | ALL  | CHRONIC MYELOID LEUKEMIA (KEGG)                     | 73               | 33               | 3.81e-55 | 3.17e-52 |
| 2   | ALL  | ACUTE MYELOID LEUKEMIA (KEGG)                       | 60               | 26               | 6.12e-42 | 2.55e-39 |
| 3   | ALL  | PATHWAYS IN CANCER (KEGG)                           | 328              | 37               | 5.48e-38 | 1.52e-35 |
| 4   | ALL  | PANCREATIC CANCER (KEGG)                            | 70               | 22               | 1.83e-31 | 3.82e-29 |
| 5   | ALL  | ERBB SIGNALING PATHWAY (KEGG)                       | 87               | 20               | 1.88e-25 | 3.14e-23 |
| 6   | ALL  | PROSTATE CANCER (KEGG)                              | 89               | 20               | 3.1e-25  | 4.3e-23  |
| 7   | ALL  | NON SMALL CELL LUNG CANCER (KEGG)                   | 54               | 17               | 3.35e-24 | 3.99e-22 |
| 8   | ALL  | COLORECTAL CANCER (KEGG)                            | 62               | 17               | 4.95e-23 | 5.15e-21 |
| 9   | ALL  | GLIOMA (KEGG)                                       | 65               | 17               | 1.22e-22 | 1.13e-20 |
| 10  | ALL  | ENDOMETRIAL CANCER (KEGG)                           | 52               | 16               | 1.35e-22 | 1.13e-20 |
| 11  | ALL  | TRKA SIGNALLING FROM THE PLASMA MEMBRANE (REACTOME) | 103              | 18               | 1.45e-20 | 1.10e-18 |
| 12  | ALL  | NEUROTROPHIN SIGNALING PATHWAY (KEGG)               | 126              | 19               | 1.85e-20 | 1.28e-18 |
| 13  | ALL  | MAPK PATHWAY (BIOCARTA)                             | 87               | 17               | 2.74e-20 | 1.76e-18 |
| 14  | ALL  | MELANOMA (KEGG)                                     | 71               | 16               | 3.62e-20 | 2.15e-18 |
| 15  | ALL  | SIGNALLING BY NGF (REACTOME)                        | 215              | 22               | 4.31e-20 | 2.39e-18 |
| 16  | ALL  | RECEPTOR SIGNALING PATHWAY (KEGG)                   | 75               | 16               | 9.38e-20 | 4.62e-18 |
| 17  | ALL  | SIGNALING PATHWAY (KEGG)                            | 137              | 19               | 9.43e-20 | 4.62e-18 |
| 18  | ALL  | RECEPTOR SIGNALING PATHWAY (KEGG)                   | 108              | 17               | 1.31e-18 | 6.04e-17 |
| 19  | ALL  | CARCINOMA (KEGG)                                    | 70               | 15               | 1.45e-18 | 6.35e-17 |
| 20  | ALL  | SIGNALING PATHWAY (KEGG)                            | 190              | 20               | 2.01e-18 | 8.36e-17 |
| 21  | ALL  | SIGNAL TRANSDUCTION (REACTOME)                      | 35               | 12               | 1.02e-17 | 4.04e-16 |
| 22  | ALL  | RACCYCD PATHWAY (BIOCARTA)                          | 26               | 11               | 1.61e-17 | 6.08e-16 |
| 23  | ALL  | LUNG CANCER (KEGG)                                  | 84               | 14               | 9.86e-16 | 3.57e-14 |
| 24  | ALL  | MEDIATED SIGNALLING (REACTOME)                      | 12               | 8                | 4.02e-15 | 1.39e-13 |
| 25  | ALL  | SIGNALING PATHWAY (KEGG)                            | 267              | 19               | 2.22e-14 | 7.38e-13 |
| 26  | ALL  | EVENTS (REACTOME)                                   | 14               | 8                | 2.40e-14 | 7.69e-13 |
| 27  | ALL  | BY PDGF (REACTOME)                                  | 64               | 12               | 3.24e-14 | 9.99e-13 |
| 28  | ALL  | TO ERKS (REACTOME)                                  | 34               | 10               | 4.01e-14 | 1.18e-12 |
| 29  | ALL  | GLEEVEC PATHWAY (BIOCARTA)                          | 23               | 9                | 4.12e-14 | 1.18e-12 |
| 30  | ALL  | MEDIATED ACTIVATION (REACTOME)                      | 16               | 8                | 1.01e-13 | 2.82e-12 |



**Table S18.** Pathways of PU1 due to the GRN of AML that infer by OIPCQ with cmi.

| No. | Base | Pathway (Database)                       | Genes in pathway | Genes overlapped | p-value  | q-value  |
|-----|------|------------------------------------------|------------------|------------------|----------|----------|
| 1   | ALL  | CHRONIC MYELOID LEUKEMIA (KEGG)          | 73               | 29               | 5.47e-48 | 4.56e-45 |
| 2   | ALL  | ACUTE MYELOID LEUKEMIA (KEGG)            | 60               | 25               | 1.85e-41 | 7.69e-39 |
| 3   | ALL  | PATHWAYS IN CANCER (KEGG)                | 328              | 34               | 7.95e-36 | 2.21e-33 |
| 4   | ALL  | PROSTATE CANCER (KEGG)                   | 89               | 23               | 2.77e-32 | 5.77e-30 |
| 5   | ALL  | GLIOMA (KEGG)                            | 65               | 18               | 1.30e-25 | 2.16e-23 |
| 6   | ALL  | ERBB SIGNALING PATHWAY (KEGG)            | 87               | 19               | 6.80e-25 | 9.45e-23 |
| 7   | ALL  | ENDOMETRIAL CANCER (KEGG)                | 52               | 16               | 1.42e-23 | 1.69e-21 |
| 8   | ALL  | MAPK PATHWAY (BIOCARTA)                  | 87               | 18               | 4.32e-23 | 4.50e-21 |
| 9   | ALL  | NON SMALL CELL LUNG CANCER (KEGG)        | 54               | 15               | 2.44e-21 | 2.26e-19 |
| 10  | ALL  | PANCREATIC CANCER (KEGG)                 | 70               | 16               | 3.01e-21 | 2.51e-19 |
| 11  | ALL  | INSULIN SIGNALING PATHWAY (KEGG)         | 137              | 19               | 6.13e-21 | 4.64e-19 |
| 12  | ALL  | B CELL RECEPTOR SIGNALING PATHWAY (KEGG) | 75               | 16               | 1.00e-20 | 6.96e-19 |
| 13  | ALL  | NEUROTROPHIN SIGNALING PATHWAY (KEGG)    | 126              | 18               | 4.85e-20 | 3.10e-18 |
| 14  | ALL  | T CELL RECEPTOR SIGNALING PATHWAY (KEGG) | 108              | 17               | 1.20e-19 | 7.15e-18 |
| 15  | ALL  | SHC MEDIATED SIGNALLING (REACTOME)       | 12               | 9                | 3.71e-18 | 2.06e-16 |
| 16  | ALL  | RENAL CELL CARCINOMA (KEGG)              | 70               | 14               | 9.96e-18 | 5.18e-16 |
| 17  | ALL  | SHC RELATED EVENTS (REACTOME)            | 14               | 9                | 3.33e-17 | 1.63e-15 |
| 18  | ALL  | COLORECTAL CANCER (KEGG)                 | 62               | 13               | 8.89e-17 | 4.11e-15 |
| 19  | ALL  | RACCYCD PATHWAY (BIOCARTA)               | 26               | 10               | 4.64e-16 | 2.03e-14 |
| 20  | ALL  | MELANOMA (KEGG)                          | 71               | 13               | 5.86e-16 | 2.44e-14 |
| 21  | ALL  | SIGNALLING BY NGF (REACTOME)             | 215              | 18               | 6.97e-16 | 2.76e-14 |
| 22  | ALL  | MAPK SIGNALING PATHWAY (KEGG)            | 267              | 19               | 1.60e-15 | 6.07e-14 |
| 23  | ALL  | BLADDER CANCER (KEGG)                    | 42               | 11               | 1.86e-15 | 6.49e-14 |
| 24  | ALL  | CHEMOKINE SIGNALING PATHWAY (KEGG)       | 190              | 17               | 1.87e-15 | 6.49e-14 |
| 25  | ALL  | GRB2 EVENTS IN EGFR SIGNALING (REACTOME) | 13               | 8                | 3.70e-15 | 1.19e-13 |
| 26  | ALL  | SOS MEDIATED SIGNALLING (REACTOME)       | 13               | 8                | 3.70e-15 | 1.19e-13 |
| 27  | ALL  | TCR PATHWAY (BIOCARTA)                   | 47               | 11               | 7.33e-15 | 2.26e-13 |
| 28  | ALL  | SIGNALLING TO ERKS (REACTOME)            | 34               | 10               | 1.09e-14 | 3.24e-13 |
| 29  | ALL  | CDMAC PATHWAY (BIOCARTA)                 | 16               | 8                | 3.63e-14 | 1.04e-12 |
| 30  | ALL  | IL2RB PATHWAY (BIOCARTA)                 | 38               | 10               | 3.82e-14 | 1.06e-12 |

**Table S19.** Pathways of ZBTB7A due to the GRN of AML that infer by OIPCQ2 with cmi2.

| No. | Base | Pathway (Database)                                  | Genes in pathway | Genes overlapped | p-value  | q-value  |
|-----|------|-----------------------------------------------------|------------------|------------------|----------|----------|
| 1   | ALL  | CHRONIC MYELOID LEUKEMIA (KEGG)                     | 73               | 32               | 9.69e-53 | 8.07e-50 |
| 2   | ALL  | ACUTE MYELOID LEUKEMIA (KEGG)                       | 60               | 25               | 1.08e-39 | 4.50e-37 |
| 3   | ALL  | PATHWAYS IN CANCER (KEGG)                           | 328              | 36               | 2.71e-36 | 7.52e-34 |
| 4   | ALL  | PANCREATIC CANCER (KEGG)                            | 70               | 21               | 1.71e-29 | 3.57e-27 |
| 5   | ALL  | ERBB SIGNALING PATHWAY (KEGG)                       | 87               | 19               | 1.09e-23 | 1.81e-21 |
| 6   | ALL  | PROSTATE CANCER (KEGG)                              | 89               | 19               | 1.74e-23 | 2.41e-21 |
| 7   | ALL  | NON SMALL CELL LUNG CANCER (KEGG)                   | 54               | 16               | 2.70e-22 | 3.22e-20 |
| 8   | ALL  | COLORECTAL CANCER (KEGG)                            | 62               | 16               | 3.30e-21 | 3.43e-19 |
| 9   | ALL  | GLIOMA (KEGG)                                       | 65               | 16               | 7.65e-21 | 7.08e-19 |
| 10  | ALL  | ENDOMETRIAL CANCER (KEGG)                           | 52               | 15               | 1.03e-20 | 8.55e-19 |
| 11  | ALL  | MAPK PATHWAY (BIOCARTA)                             | 87               | 17               | 2.74e-20 | 2.07e-18 |
| 12  | ALL  | TRKA SIGNALLING FROM THE PLASMA MEMBRANE (REACTOME) | 103              | 17               | 5.64e-19 | 3.91e-17 |
| 13  | ALL  | NEUROTROPHIN SIGNALING PATHWAY (KEGG)               | 126              | 18               | 6.21e-19 | 3.98e-17 |
| 14  | ALL  | SIGNALLING BY NGF (REACTOME)                        | 215              | 21               | 1.02e-18 | 6.07e-17 |
| 15  | ALL  | MELANOMA (KEGG)                                     | 71               | 15               | 1.82e-18 | 1.01e-16 |
| 16  | ALL  | INSULIN SIGNALING PATHWAY (KEGG)                    | 137              | 18               | 2.87e-18 | 1.50e-16 |
| 17  | ALL  | B CELL RECEPTOR SIGNALING PATHWAY (KEGG)            | 75               | 15               | 4.40e-18 | 2.16e-16 |
| 18  | ALL  | DOWN STREAM SIGNAL TRANSDUCTION (REACTOME)          | 35               | 12               | 1.02e-17 | 4.71e-16 |
| 19  | ALL  | T CELL RECEPTOR SIGNALING PATHWAY (KEGG)            | 108              | 16               | 4.36e-17 | 1.91e-15 |
| 20  | ALL  | CHEMOKINE SIGNALING PATHWAY (KEGG)                  | 190              | 19               | 4.62e-17 | 1.92e-15 |
| 21  | ALL  | RENAL CELL CARCINOMA (KEGG)                         | 70               | 14               | 6.65e-17 | 2.64e-15 |
| 22  | ALL  | RACCYCD PATHWAY (BIOCARTA)                          | 26               | 10               | 1.72e-15 | 6.50e-14 |
| 23  | ALL  | SHC MEDIATED SIGNALLING (REACTOME)                  | 12               | 8                | 4.01e-15 | 1.45e-13 |
| 24  | ALL  | SHC RELATED EVENTS (REACTOME)                       | 14               | 8                | 2.40e-14 | 8.33e-13 |
| 25  | ALL  | SIGNALING BY PDGF (REACTOME)                        | 64               | 12               | 3.23e-14 | 1.04e-12 |
| 26  | ALL  | SMALL CELL LUNG CANCER (KEGG)                       | 84               | 13               | 3.25e-14 | 1.04e-12 |
| 27  | ALL  | SIGNALLING TO ERKS (REACTOME)                       | 34               | 10               | 4.00e-14 | 1.23e-12 |
| 28  | ALL  | FRS2 MEDIATED ACTIVATION (REACTOME)                 | 16               | 8                | 1.01e-13 | 3.02e-12 |
| 29  | ALL  | MAPK SIGNALING PATHWAY (KEGG)                       | 267              | 18               | 3.24e-13 | 9.30e-12 |
| 30  | ALL  | BLADDER CANCER (KEGG)                               | 42               | 10               | 4.24e-13 | 1.18e-11 |

**Table S20.** Pathways of PU1 due to the GRN of AML that infer by OIPCQ2 with cmi2.

| No. | Base | Pathway (Database)                       | Genes in pathway | Genes overlapped | p-value  | q-value  |
|-----|------|------------------------------------------|------------------|------------------|----------|----------|
| 1   | ALL  | CHRONIC MYELOID LEUKEMIA (KEGG)          | 73               | 29               | 5.47e-48 | 4.56e-45 |
| 2   | ALL  | ACUTE MYELOID LEUKEMIA (KEGG)            | 60               | 25               | 1.85e-41 | 7.69e-39 |
| 3   | ALL  | PATHWAYS IN CANCER (KEGG)                | 328              | 34               | 7.95e-36 | 2.21e-33 |
| 4   | ALL  | PROSTATE CANCER (KEGG)                   | 89               | 23               | 2.77e-32 | 5.77e-30 |
| 5   | ALL  | GLIOMA (KEGG)                            | 65               | 18               | 1.30e-25 | 2.16e-23 |
| 6   | ALL  | ERBB SIGNALING PATHWAY (KEGG)            | 87               | 19               | 6.80e-25 | 9.45e-23 |
| 7   | ALL  | ENDOMETRIAL CANCER (KEGG)                | 52               | 16               | 1.42e-23 | 1.69e-21 |
| 8   | ALL  | MAPK PATHWAY (BIOCARTA)                  | 87               | 18               | 4.32e-23 | 4.50e-21 |
| 9   | ALL  | NON SMALL CELL LUNG CANCER (KEGG)        | 54               | 15               | 2.44e-21 | 2.26e-19 |
| 10  | ALL  | PANCREATIC CANCER (KEGG)                 | 70               | 16               | 3.01e-21 | 2.51e-19 |
| 11  | ALL  | INSULIN SIGNALING PATHWAY (KEGG)         | 137              | 19               | 6.13e-21 | 4.64E-19 |
| 12  | ALL  | B CELL RECEPTOR SIGNALING PATHWAY (KEGG) | 75               | 16               | 1.00e-20 | 6.96e-19 |
| 13  | ALL  | NEUROTROPHIN SIGNALING PATHWAY (KEGG)    | 126              | 18               | 4.85e-20 | 3.10e-18 |
| 14  | ALL  | T CELL RECEPTOR SIGNALING PATHWAY (KEGG) | 108              | 17               | 1.20e-19 | 7.15e-18 |
| 15  | ALL  | SHC MEDIATED SIGNALLING (REACTOME)       | 12               | 9                | 3.71e-18 | 2.06e-16 |
| 16  | ALL  | RENAL CELL CARCINOMA (KEGG)              | 70               | 14               | 9.96e-18 | 5.18e-16 |
| 17  | ALL  | SHC RELATED EVENTS (REACTOME)            | 14               | 9                | 3.33e-17 | 1.63e-15 |
| 18  | ALL  | COLORECTAL CANCER (KEGG)                 | 62               | 13               | 8.89e-17 | 4.11e-15 |
| 19  | ALL  | RACCYCD PATHWAY (BIOCARTA)               | 26               | 10               | 4.64e-16 | 2.03e-14 |
| 20  | ALL  | MELANOMA (KEGG)                          | 71               | 13               | 5.86e-16 | 2.44e-14 |
| 21  | ALL  | SIGNALLING BY NGF (REACTOME)             | 215              | 18               | 6.97e-16 | 2.76e-14 |
| 22  | ALL  | MAPK SIGNALING PATHWAY (KEGG)            | 267              | 19               | 1.60e-15 | 6.07e-14 |
| 23  | ALL  | BLADDER CANCER (KEGG)                    | 42               | 11               | 1.86e-15 | 6.49e-14 |
| 24  | ALL  | CHEMOKINE SIGNALING PATHWAY (KEGG)       | 190              | 17               | 1.87e-15 | 6.49e-14 |
| 25  | ALL  | GRB2 EVENTS IN EGFR SIGNALING (REACTOME) | 13               | 8                | 3.70e-15 | 1.19e-13 |
| 26  | ALL  | SOS MEDIATED SIGNALLING (REACTOME)       | 13               | 8                | 3.70e-15 | 1.19e-13 |
| 27  | ALL  | TCR PATHWAY (BIOCARTA)                   | 47               | 11               | 7.33e-15 | 2.26e-13 |
| 28  | ALL  | SIGNALLING TO ERKS (REACTOME)            | 34               | 10               | 1.09e-14 | 3.24e-13 |
| 29  | ALL  | CDMAC PATHWAY (BIOCARTA)                 | 16               | 8                | 3.63e-14 | 1.04e-12 |
| 30  | ALL  | IL2RB PATHWAY (BIOCARTA)                 | 38               | 10               | 3.82e-14 | 1.06e-12 |
